# Supplementary material for: Genome-wide analysis of chromosomal import patterns after natural transformation of Helicobacter pylori
Source: PubMed Central journal article supplement (PMC4917963; doi:10.1038/ncomms11995), 2016-06-22
Supplement: ncomms11995-s1.pdf [file ncomms11995-s1.pdf]

**a Short-Term Transformation Experiment (STT)**

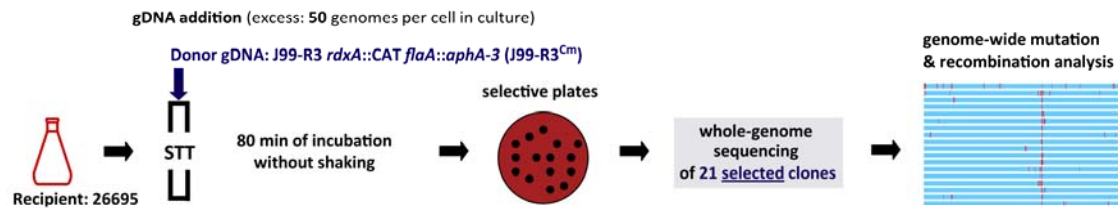

**b Transformation Cycle Experiment (TC)**

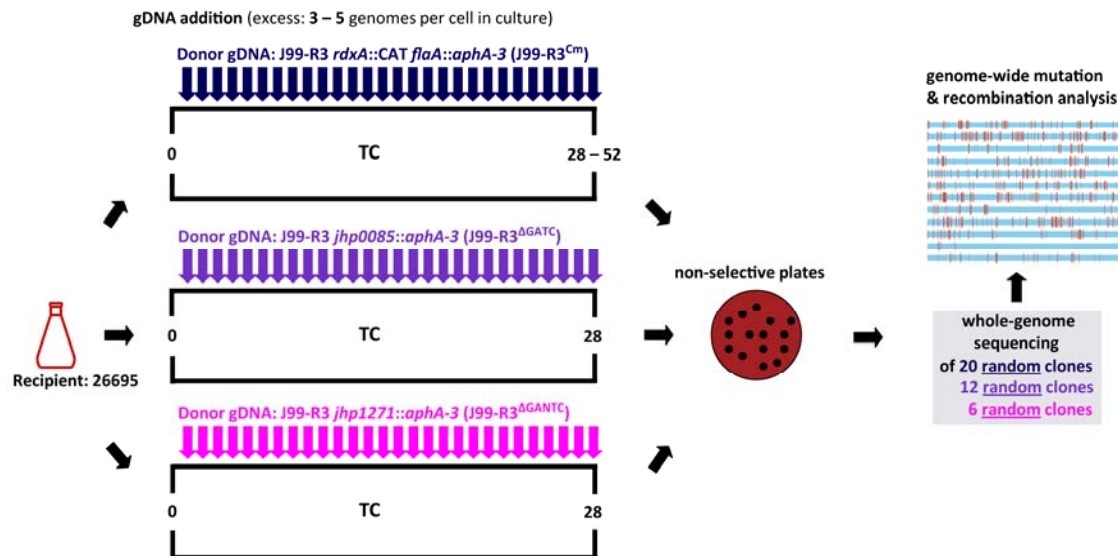

**Supplementary Figure 1:** Schematic overview of the STT (a) and TC (b) experimental setup. Color-coding of the donor gDNA is the same as in Fig. 1 and 3. **a**, Liquid cultures of *H. pylori* 26695 were naturally transformed with an excess of 50 genomes of J99-R3<sup>Cm</sup> donor gDNA per recipient cell. After 80 min of incubation, serial dilutions of the cultures were plated onto Cm-containing blood agar plates for selection of the *rdxA::CAT* allele. Single colonies were randomly selected and their gDNA was subjected to Illumina MiSeq for whole-genome sequencing. The sequences were mapped to the *H. pylori* 26695 genome and subsequently analyzed for genome-wide mutation and recombination events. In the scheme on the right, vertical lines (red) correspond to recombination events in genomes (blue bars) of the STT clones. **b**, Liquid cultures of *H. pylori* 26695 were repeatedly transformed with an excess of 3-5 genomes of donor gDNA per recipient cell over a time period of 28-52 days. Natural transformation was performed individually with gDNA of three different donor strains. Independent recipient cultures were grown for ~14 h before donor DNA was added and following an incubation of 10 h an aliquot of the culture was transferred to fresh medium to start another cycle of transformation. After completion of the final transformation cycle, serial dilutions of the cultures were plated onto non-selective blood agar plates. Single colonies were randomly selected and their gDNA was subjected to 454 pyrosequencing or Illumina MiSeq technology for whole-genome sequencing. The sequences of the TC clones were analyzed as described for the STT experiment.

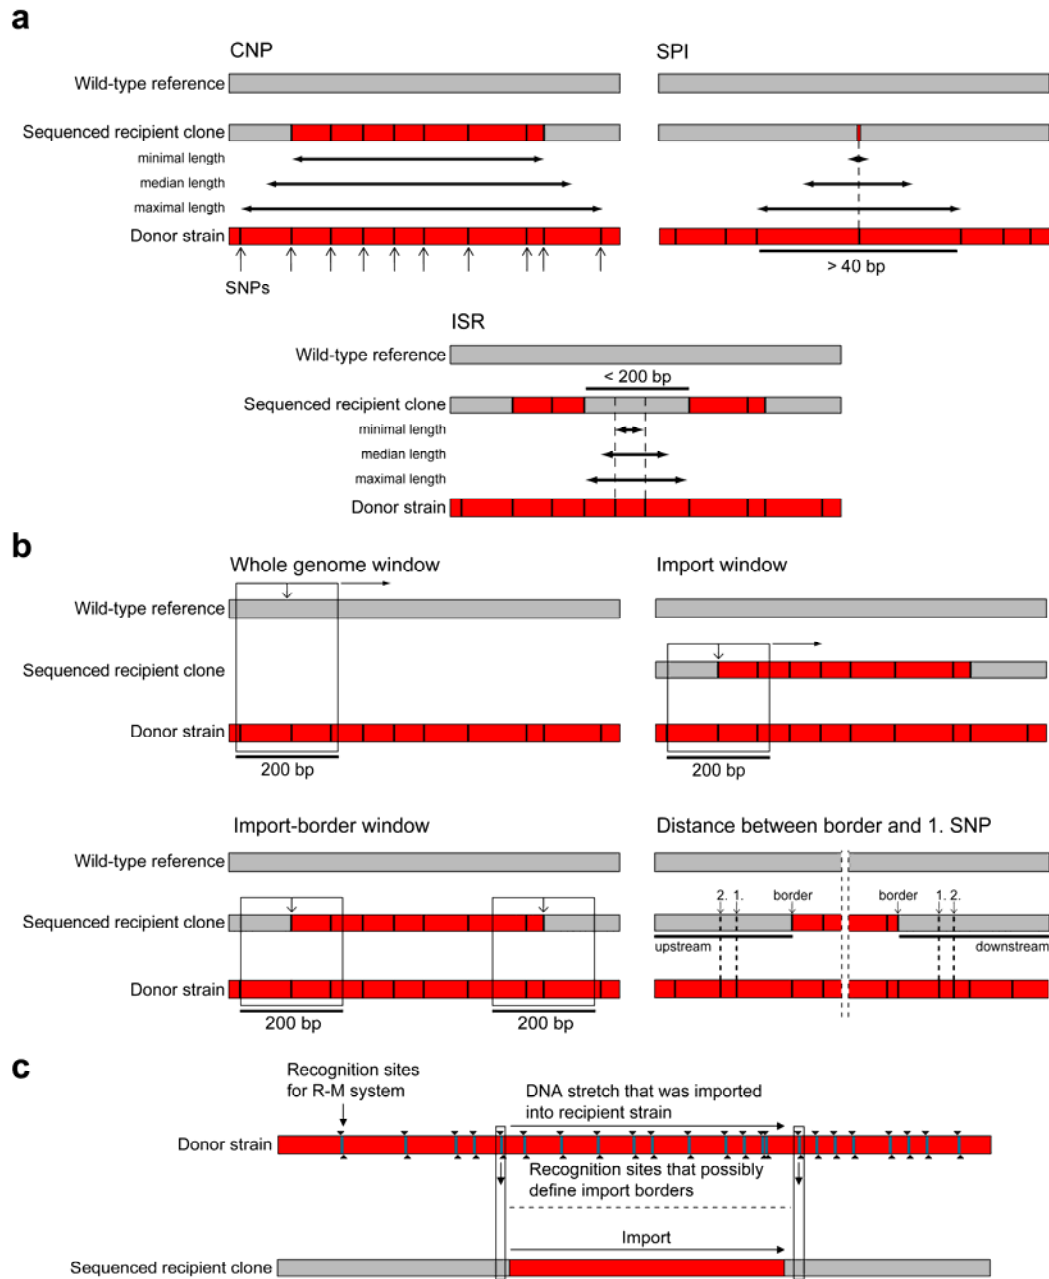

**Supplementary Figure 2:** Schematic overview of import parameters (a), SNP density and distance analyses (b), and mapping of restriction sites (c). Grey and red horizontal bars represent regions of the *H. pylori* 26695 recipient and the donor strain genome, respectively. Red stretches within the grey bars of recipient clones represent recombination events. a and b, Black vertical lines indicate positions of sequence polymorphisms between donor and recipient. c, Blue vertical lines depict recognition sites for R-M systems and the black triangles represent cleavage sites for REases.

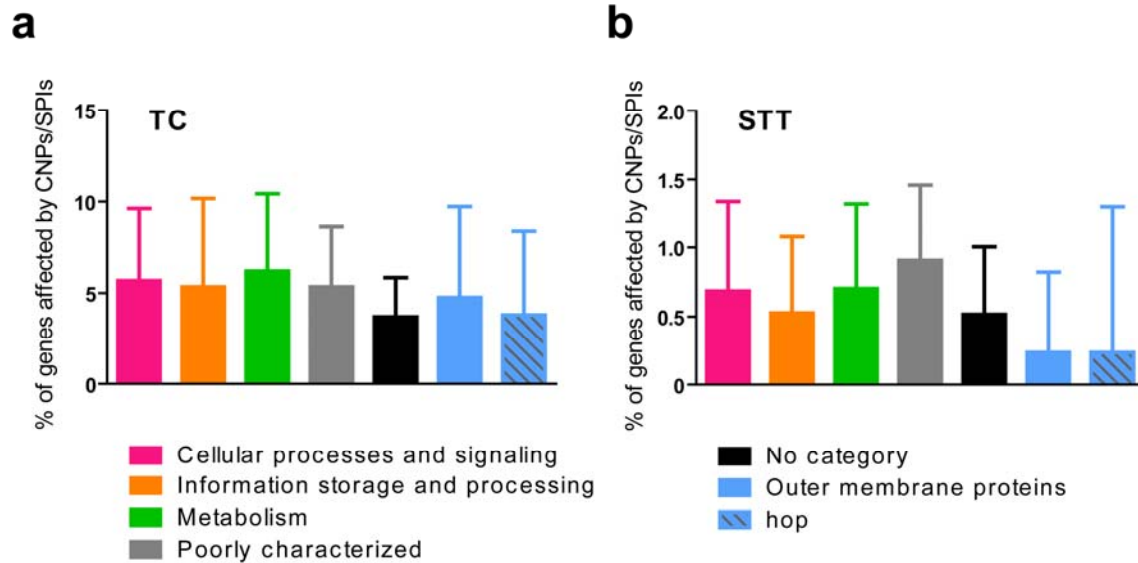

**Supplementary Figure 3:** Proportion of genes from different functional classes of encoded proteins affected by CNPs/SPIs in the TC (**a**) and the STT (**b**) experiments. Import frequency per category was calculated by normalizing to imports per strain and total genes within functional classes in 26695. Legend displays color-coding of bars. Error bars depict standard deviations. Outer membrane proteins (blue) and hop subfamily (blue with lines) classification is based on ref.<sup>1</sup>.

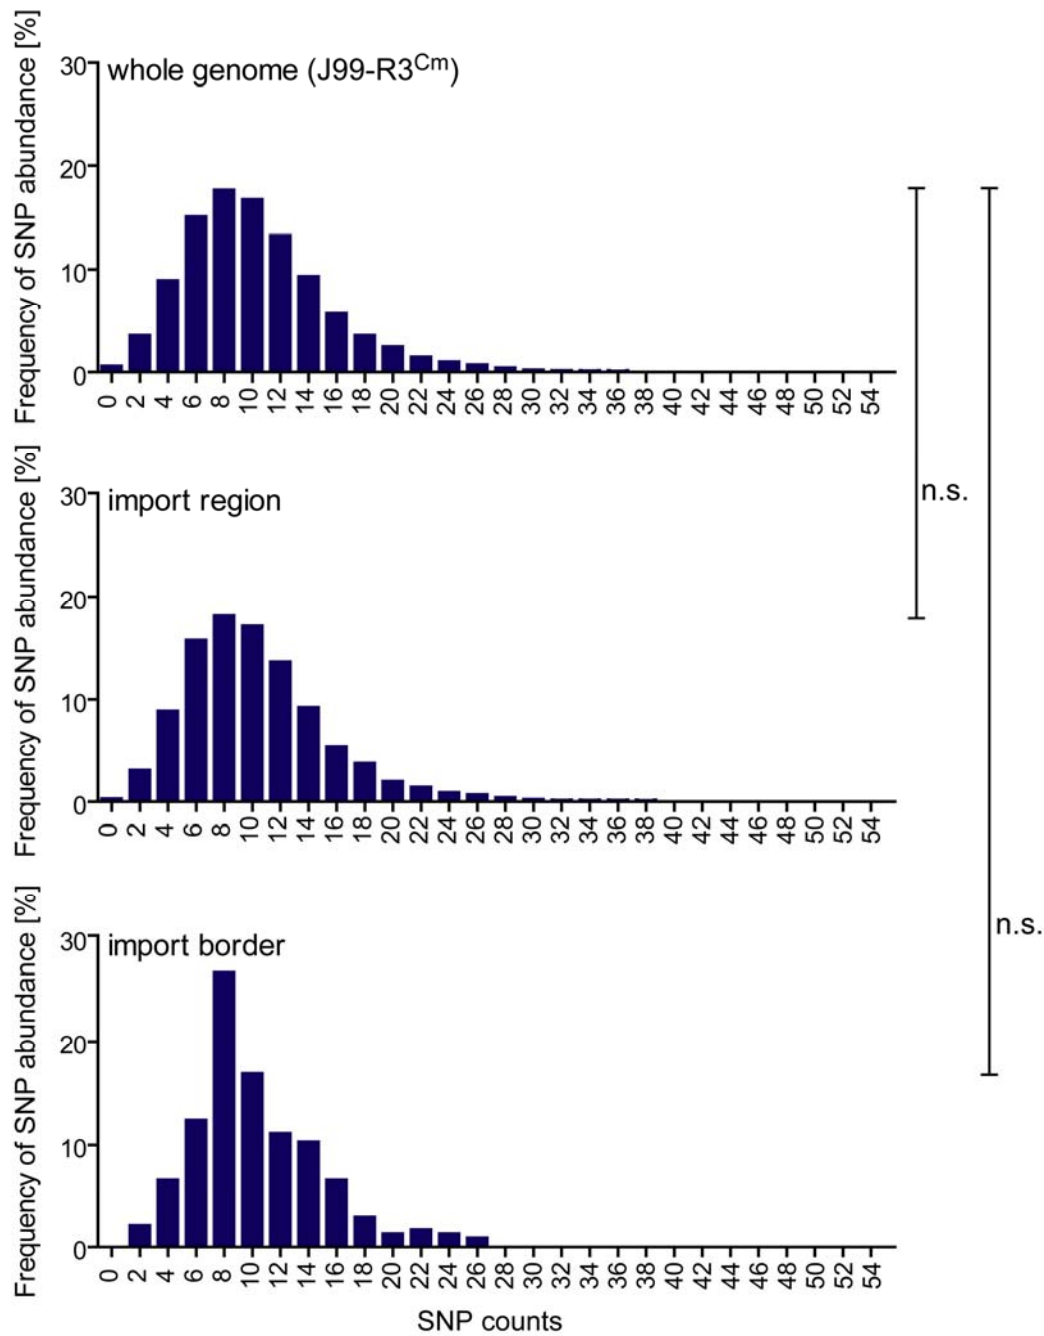

**Supplementary Figure 4:** SNP density analyses for *H. pylori* 26695 and transformant clones. The relative frequency of the SNP density on the whole-genome level (J99-R3<sup>Cm</sup>), within recombination events (import region) and near import borders is plotted (see Materials and Methods for details). The number of SNPs within 200-bp windows was determined with the target position in the center of the window. Welch's *t* test (two-sided) was used to determine statistically significant differences. n.s. - not significant.

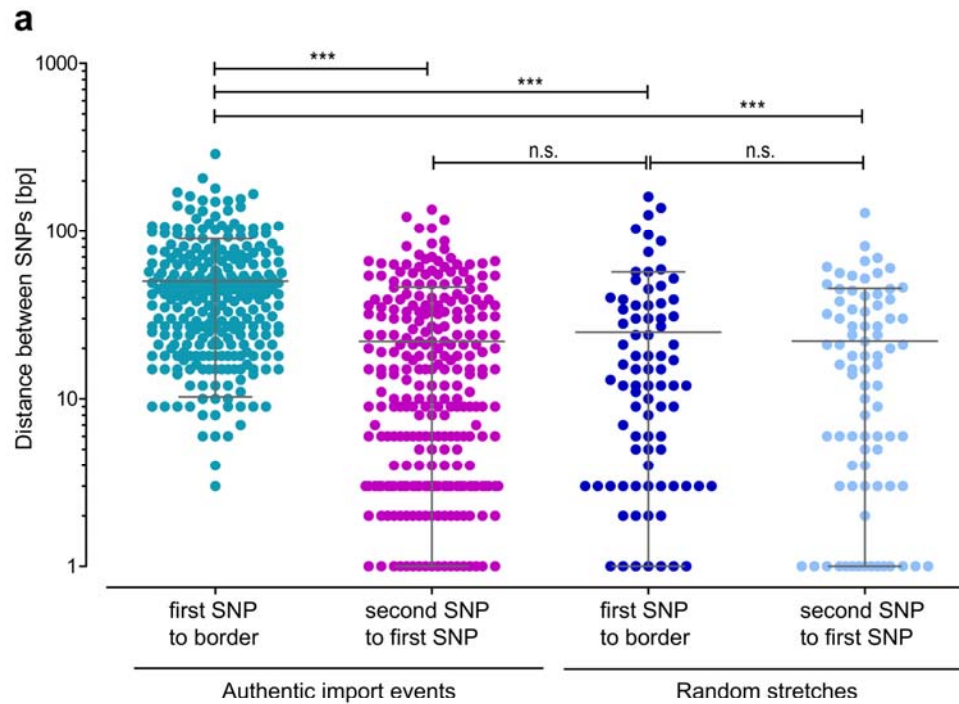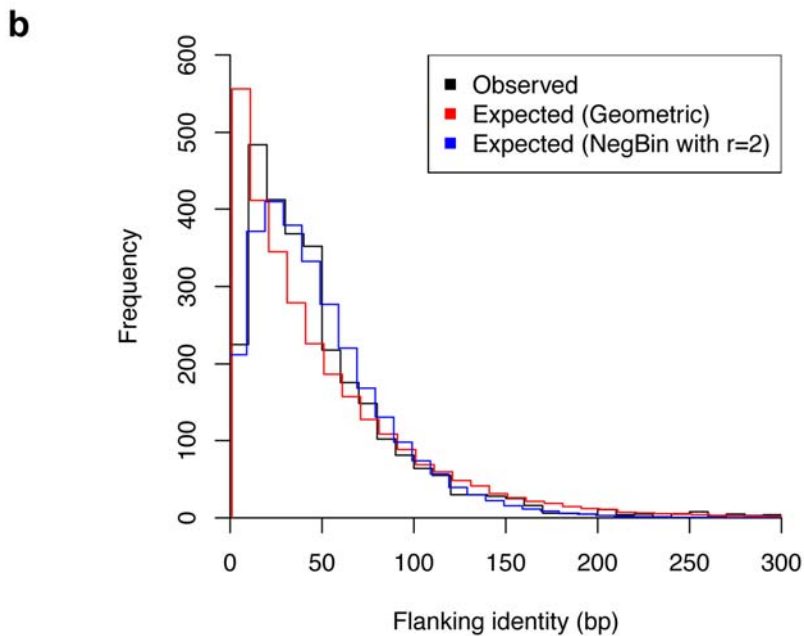

**Supplementary Figure 5: a**, Scatter plots representing the distance between selected SNPs for the set of 84 representative import events and 40 random stretches used for Figure 3. For each import or random stretch, the distances between the proximate donor-specific polymorphism flanking the import/stretch (first SNP) and the SNP bordering an import/stretch (border) as well as the distance between the second proximate donor-specific polymorphism flanking the import/stretch (second SNP) and the first SNP were plotted on a logarithmic scale. Each dot represents one value. The arithmetic mean is indicated by a long vertical line and the standard deviation by short vertical lines. Significant differences were determined using non-parametric Mann Whitney test (two-sided) and are labeled with asterisks (\*\*\*) -  $p < 0.001$ , n.s. - not significant. **b**, Comparison of the observed distribution of length of identical sequence flanking recombination events (black) with expectations under a Geometric model (red) and Negative-Binomial model with parameter  $r=2$  (blue).

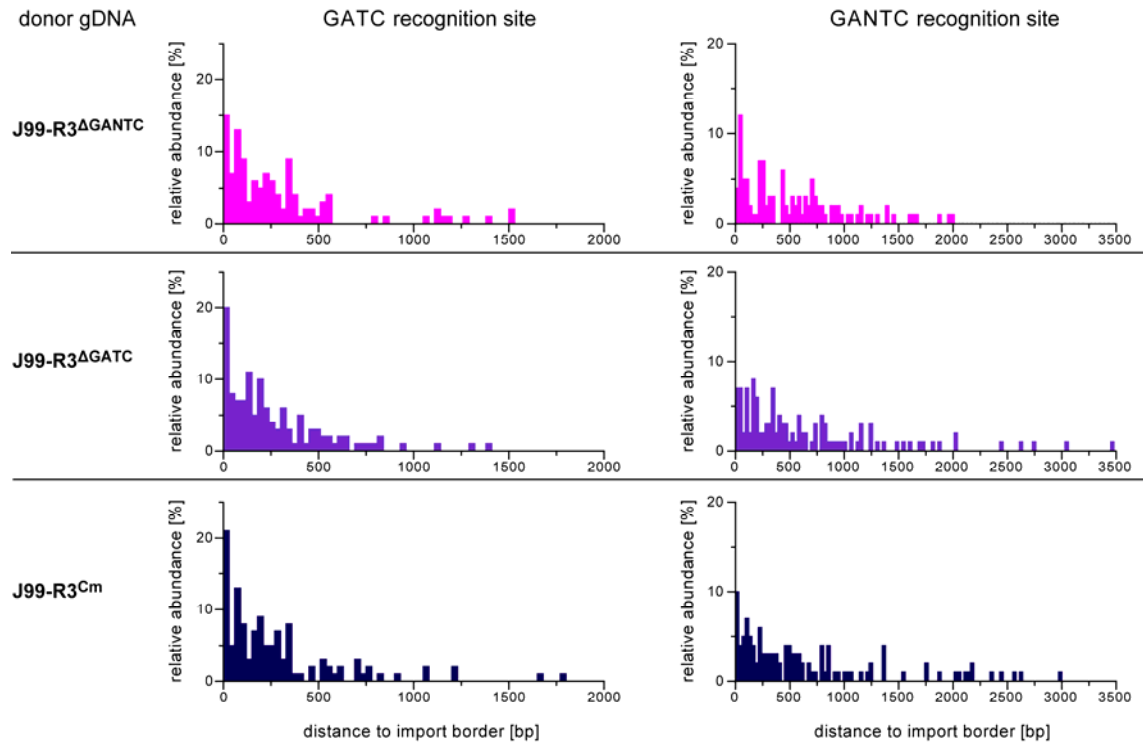

**Supplementary Figure 6:** Distribution of GATC or GANTC recognition sites in the proximity of import borders for different recipient-donor combinations of TC clones. Strain 26695 was used as recipient and the respective donor gDNA is indicated retaining the same color code as in Fig. 3. The relative abundance of GATC or GANTC recognition sites within the flanking region of approx. 60 randomly selected recombination events per combination were plotted. Non-parametric Mann Whitney test was used assuming Gaussian approximation to compare populations regarding import to GATC-recognition site (left side) or GANTC-recognition site (right side). Populations were not significantly different.

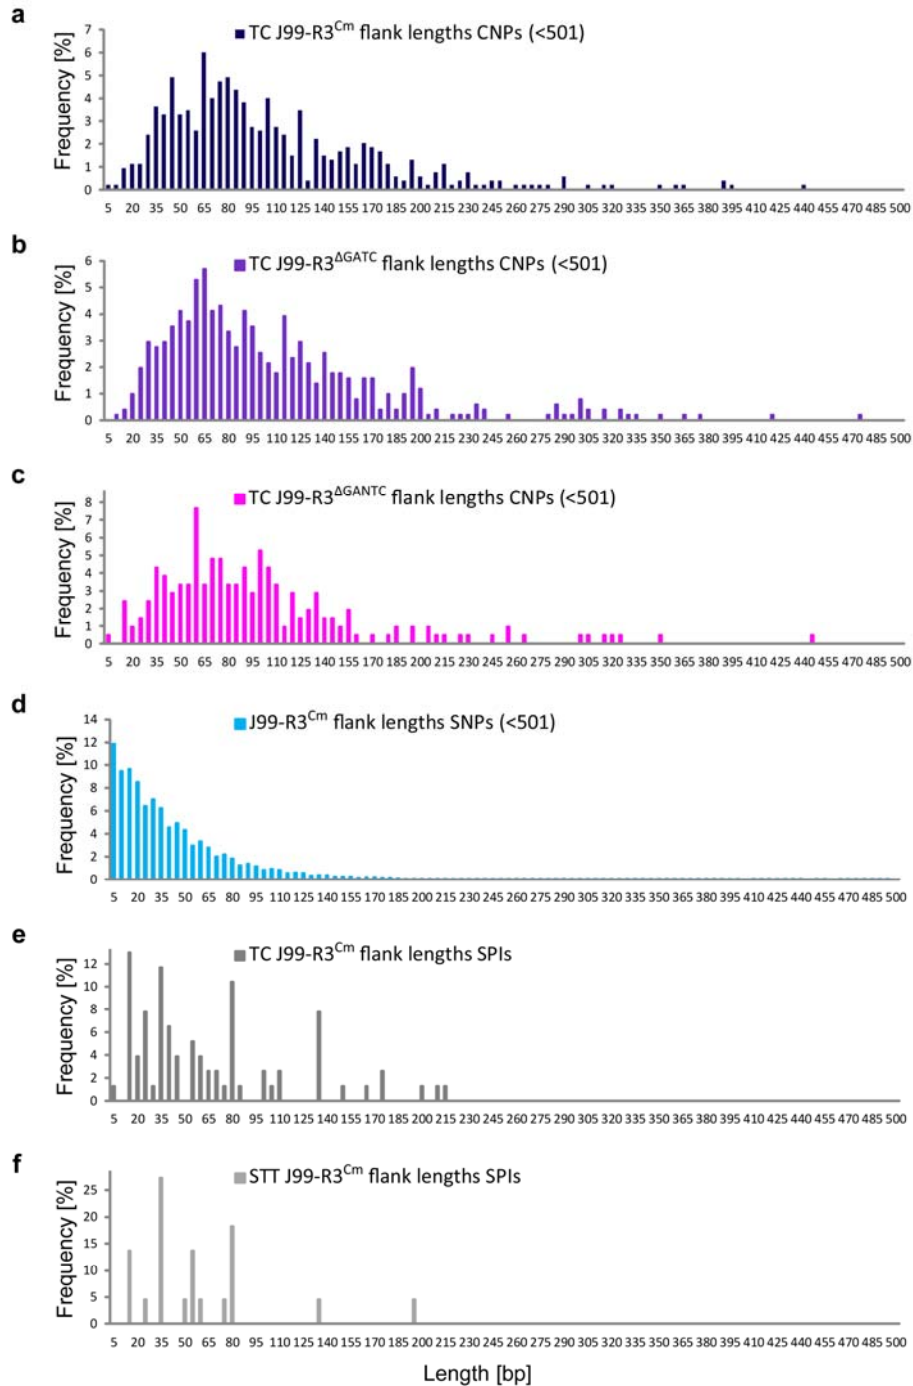

**Supplementary Figure 7:** Analysis of the length distribution of flanking region for CNPs of TC clones (**a - c**), SNPs between 26695 and J99-R3<sup>Cm</sup> (**d**) and SPIs of TC and STT clones (**e** and **f**). The relative frequency of events was plotted and the bin size for the length distribution was 5 bp. **a - c**, The lengths of the flanking regions of all import events detected for the TC clones were analyzed. For this, the combined distance of both import borders to the proximate SNP upstream and downstream of a particular import was plotted for every recombination event. Only values below 501 bp were included. **d**, Based on the sequence comparison between *H. pylori* 26695 (recipient) and J99-R3<sup>Cm</sup> (donor), the size of the donor-recipient identical flanking region for every single SNP was plotted, which comprises the combined distance of a particular SNP to the next SNP in the upstream and in the downstream region. Only values below 501 bp were included. **e** and **f**, The length of flanking regions of the SPIs detected for TC and STT clones was determined as described for panel **d**.

Supplementary Table 1: Bacterial strains.

| Strain                            | Genotype                                                                                                                                                                                                                                                                                                                                        | Source     |
|-----------------------------------|-------------------------------------------------------------------------------------------------------------------------------------------------------------------------------------------------------------------------------------------------------------------------------------------------------------------------------------------------|------------|
| <b><i>Escherichia coli</i></b>    |                                                                                                                                                                                                                                                                                                                                                 |            |
| DH5 $\alpha$                      | F <sup>-</sup> , $\phi$ 80d <i>lacZ</i> $\Delta$ M15, $\Delta$ ( <i>lacZYA-argF</i> )U169, <i>deoR</i> , <i>recA1</i> , <i>endA1</i> , <i>hsdR17</i> ( <i>rk<sup>-</sup></i> , <i>mk<sup>+</sup></i> ), <i>phoA</i> , <i>supE44</i> , $\lambda$ <sup>-</sup> , <i>thi-1</i> , <i>gyrA96</i> , <i>relA1</i>                                      | 2          |
| DH5 $\alpha$ $\lambda$ pir        | $\phi$ 80d <i>lacZ</i> $\Delta$ M15 $\Delta$ ( <i>lacZYA-argF</i> )U169 <i>recA1</i> <i>hsdR17</i> <i>deoR</i> <i>thi-1</i> <i>supE44</i> <i>gyrA96</i> <i>relA1</i> / $\lambda$ pir                                                                                                                                                            | 3          |
| MC1061                            | <i>araD139</i> , $\Delta$ ( <i>ara</i> , <i>leu</i> )7697, $\Delta$ <i>lacX74</i> , <i>galU</i> <sup>-</sup> , <i>galK</i> <sup>-</sup> , <i>hsr</i> <sup>-</sup> , <i>hsm</i> <sup>-</sup> , <i>strA</i>                                                                                                                                       | 4          |
| <b><i>Helicobacter pylori</i></b> |                                                                                                                                                                                                                                                                                                                                                 |            |
| 26695                             | <i>H. pylori</i> wild-type strain                                                                                                                                                                                                                                                                                                               | 5          |
| Bac339                            | J99-R3 <i>rdx::cat flaA::aphA-3</i> (referred to as J99-R3 <sup>Cm</sup> ), derivative of J99-R3                                                                                                                                                                                                                                                | This study |
| Bac454                            | J99-R3 <i>jhp0085::aphA-3</i> (referred to as J99-R3 <sup><math>\Delta</math>GATC</sup> ), inactivation of the GATC-specific Type II MTase JHP0085 (M.Hpy99VI) from strain J99-R3                                                                                                                                                               | 6          |
| Bac465                            | J99-R3 <i>jhp1271::aphA-3</i> (referred to as J99-R3 <sup><math>\Delta</math>GANTC</sup> ), inactivation of the GANTC-specific Type II MTase JHP1271 (M.Hpy99IX) from strain J99-R3                                                                                                                                                             | 6          |
| Bac534                            | J99-R3 <i>jhp0085::aphA-3 rdxA::cat</i> (referred to as J99-R3 <sup><math>\Delta</math>GATC-Cm</sup> ), derivative of Bac454 containing a <i>rdxA::cat</i> disruption                                                                                                                                                                           | This study |
| Bac535                            | J99-R3 <i>jhp1271::aphA-3 rdxA::cat</i> (referred to as J99-R3 <sup><math>\Delta</math>GANTC-Cm</sup> ), derivative of Bac465 containing a <i>rdxA::cat</i> disruption                                                                                                                                                                          | This study |
| Bac555                            | 26695 $\Delta$ <i>hpy0053</i> $\Delta$ <i>hpy0091</i> $\Delta$ <i>hpy1351</i> $\Delta$ <i>hpy1366</i> <i>rdxA::aphA-3</i> , marker-free deletion mutant of the four active Type II REases of 26695                                                                                                                                              | This study |
| Bac568                            | J99-R3 <i>jhp0085 jhp1271 rdxA::CAT</i> (referred to as J99-R3 <sup><math>\Delta</math>GATC <math>\Delta</math>GANTC</sup> ), J99-R3 containing a <i>rdxA::cat</i> disruption and marker-free partial deletions of the Type II MTases JHP0085 (M.Hpy99VI, GATC) and JHP1271 (M.Hpy99IX, GANTC) using alleles derived from pSUS3017 and pSUS3020 | This study |
| Bac570                            | 26695 <i>rdxA::aphA-3</i>                                                                                                                                                                                                                                                                                                                       | This study |
| Bac569                            | 26695 <i>rdxA::CAT</i>                                                                                                                                                                                                                                                                                                                          | This study |
| J99-R3                            | Derivative of J99; A to T mutation at position 1618 in <i>rpoB</i> ; Rif <sup>r</sup>                                                                                                                                                                                                                                                           | 7          |



Supplementary Table 2: Oligonucleotide primers used for *H. pylori* insertion mutagenesis.

| Primer                | Target gene | 5' → 3' sequence*                                                  | RS**   | Application                                                 | Source     |
|-----------------------|-------------|--------------------------------------------------------------------|--------|-------------------------------------------------------------|------------|
| HPrdxA-1              |             | TTT AAA TTT GAG CAT GGG GCA G                                      | -      | Amplification of <i>rdxA</i> locus from pCJ535 and pSUS2928 | This study |
| HPrdxA-2              |             | TGA AAA CAC CCC TAA AAG AGC G                                      | -      |                                                             | This study |
| PstI-HP0053-up-fwd    | hp0053      | T GGC <u>CTG CAG</u> GCT GAT GCT TTT AAT GAA TAT CCC T             | PstI   | In frame deletion of hp0053 (CCTTC-specific Type II REase)  | This study |
| OL-ΔHP0053-rev        |             | <i>TAG CTT GAA AGC</i> TTT CAT AAG CTA CTC CTT AAA ATT CCA         | -      |                                                             | This study |
| OL-ΔHP0053-fwd        |             | <i>TAG CTT ATG AAA</i> GCT TTC AAG CTA AAA TTT TAA TAA GTT TTA TTG | -      |                                                             | This study |
| PspOMI-HP0053-dwn-rev |             | GGA GGG <u>CCC</u> AGT GAT TAG GGC TTG TTT ATC GC                  | PspOMI |                                                             | This study |
| Check-HP0053-fwd      |             | GCC AAA ACA CGA TCC ACC CC                                         | -      |                                                             | This study |
| Check-HP0053-rev      |             | TTT CGG TTT GAG TGA TGT CCC C                                      | -      |                                                             | This study |
| PstI-HP0091-up-fwd    | hp0091      | T GGC <u>CTG CAG</u> AAA CGC CTT TAT GGA AGA CAT TCC               | PstI   | In frame deletion of hp0091 (GATC-specific Type II REase)   | This study |
| OL-ΔHP0091-up-rev     |             | <i>AAT GCG CGA TTA</i> GTT TTT CAT TTT TGC TCC GCT TTA ATG         | -      |                                                             | This study |
| OL-ΔHP0091-dwn-fwd    |             | <i>AAA ATG AAA AAC</i> TAA TCG CGC ATT CTA ATG AAA TCG             | -      |                                                             | This study |
| PspOMI-HP0091-dwn-rev |             | GGA GGG <u>CCC</u> TGA TAG GGT GAG TCA AGA AAT CGT                 | PspOMI |                                                             | This study |
| Check-HP0091-fwd      |             | TTG CCA ATC TTG CTA TAA GCG AC                                     | -      |                                                             | This study |
| Check-HP0091-rev      |             | AAG CTA GTA AGA GAC GCG CTC                                        | -      |                                                             | This study |
| PstI-HP1351-up-fwd    | hp1351      | T GGC <u>CTG CAG</u> ATA TCG CCC TTA TCT TAT CGC G                 | PstI   | In frame deletion of hp1351 (GANTC-specific Type II REase)  | This study |
| OL-ΔHP1351-up-rev     |             | <i>GAG CCT CTA TCG</i> GTC CAT TAA GAG TCC TTT TGG CAG             | -      |                                                             | This study |
| OL-ΔHP1351-dwn-fwd    |             | <i>CTC TTA ATG GAC</i> CGA TAG AGG CTC TAA AGT AAG CC              | -      |                                                             | This study |
| PspOMI-HP1351-dwn-rev |             | GGA GGG <u>CCC</u> ATC GTT GAT CAT TTT AGG AGT AAT CTC             | PspOMI |                                                             | This study |
| Check-HP1351-fwd      |             | AAT CTT GCA AAA TCC ACC CCC C                                      | -      |                                                             | This study |
| Check-HP1351-rev      |             | GTT TTC AAG CTG TCA ATA GCG GT                                     | -      |                                                             | This study |
| PstI-HP1366-up-fwd    | hp1366      | T GGC <u>CTG CAG</u> ATG TTG AAG ATT TAG GGG CGT TAG               | PstI   | In frame deletion of hp1366 (GAAGA-specific Type II REase)  | This study |
| OL-ΔHP1366-up-rev     |             | <i>ATT TTA TCA GCC</i> CAT GTC AAA TAT CCT TTT TTA TTC GCA TT      | -      |                                                             | This study |
| OL-ΔHP1366-dwn-fwd    |             | <i>ATA TTT GAC ATG</i> GGC TGA TAA AAT AAA GCG GTG TCT             | -      |                                                             | This study |
| PspOMI-HP1366-dwn-rev |             | GCA GGG <u>CCC</u> GCG TGT TTT CTT TAA TAA TCA GGG C               | PspOMI |                                                             | This study |
| Check-HP1366-fwd      |             | ACA AGA TTT ACA GCA TTC AGC CC                                     | -      |                                                             | This study |
| Check-HP1366-rev      |             | CTT GTG GTA GTC TAT CAT CTC GC                                     | -      |                                                             | This study |

\*restriction sites are labeled by underlining, overlap regions are highlighted in italics

\*\*RS – restriction site

Supplementary Table 3: Plasmids used in this study.

| Plasmids      | Genotype                                                                                                                                                                            | Source     |
|---------------|-------------------------------------------------------------------------------------------------------------------------------------------------------------------------------------|------------|
| pBHpC8        | Cm <sup>r</sup> , Source of the <i>cat</i> cassette                                                                                                                                 | 8          |
| pCJ535        | Amp <sup>r</sup> , Cm <sup>r</sup> , pUC19 derivative containing <i>rdxA</i> ( <i>hp0954</i> ) disrupted by a <i>cat</i> resistance cassette                                        | 9          |
| pILL600       | Amp <sup>r</sup> , Km <sup>r</sup> , Source of the <i>aphA-3</i> cassette                                                                                                           | 10         |
| pNPTS138-R6KT | Km <sup>r</sup> , <i>mobRP4</i> <sup>+</sup> <i>ori</i> -R6K <i>sacB</i> ; beta-galactosidase fragment alpha; suicide plasmid for in-frame deletions or integrations                | 11         |
| pSUS10        | Amp <sup>r</sup> , Km <sup>r</sup> , pHL319-2-4 derivative containing <i>flaA</i> from <i>H. pylori</i> 898-1 disrupted by the <i>aphA-3</i> cassette, source of <i>flaA::aphA3</i> | 12         |
| pSUS2928      | Amp <sup>r</sup> , Km <sup>r</sup> , pCJ535 derivative containing <i>rdxA</i> ( <i>hp0954</i> ) disrupted by a <i>aphA-3</i> resistance cassette                                    | This study |
| pSUS3017      | Amp <sup>r</sup> , pUC19 derivative containing <i>jhp0085</i> lacking a central part of the gene                                                                                    | 6          |
| pSUS3020      | Amp <sup>r</sup> , pUC19 derivative containing <i>jhp1271</i> lacking a central part of the gene                                                                                    | 6          |
| pSUS3152      | Km <sup>r</sup> , pNPTS138-R6KT derivative containing up- and downstream regions flanking the $\Delta$ <i>hp0621</i> deletion                                                       | This study |
| pSUS3153      | Km <sup>r</sup> , pNPTS138-R6KT derivative containing up- and downstream regions flanking the $\Delta$ <i>hp0821</i> deletion                                                       | This study |
| pSUS3154      | Km <sup>r</sup> , pNPTS138-R6KT derivative containing up- and downstream regions flanking the $\Delta$ <i>hp1089</i> deletion                                                       | This study |
| pSUS3155      | Km <sup>r</sup> , pNPTS138-R6KT derivative containing up- and downstream regions flanking the $\Delta$ <i>hp1478</i> deletion                                                       | This study |
| pSUS3156      | Km <sup>r</sup> , pNPTS138-R6KT derivative containing up- and downstream regions flanking the $\Delta$ <i>hp1523</i> deletion                                                       | This study |
| pSUS3157      | Km <sup>r</sup> , pNPTS138-R6KT derivative containing up- and downstream regions flanking the $\Delta$ <i>hp1553</i> deletion                                                       | This study |
| pSUS3225      | Km <sup>r</sup> , pNPTS138-R6KT derivative containing up- and downstream regions flanking the $\Delta$ <i>hp0053</i> deletion                                                       | This study |
| pSUS3226      | Km <sup>r</sup> , pNPTS138-R6KT derivative containing up- and downstream regions flanking the $\Delta$ <i>hp0091</i> deletion                                                       | This study |
| pSUS3227      | Km <sup>r</sup> , pNPTS138-R6KT derivative containing up- and downstream regions flanking the $\Delta$ <i>hp1351</i> deletion                                                       | This study |
| pSUS3228      | Km <sup>r</sup> , pNPTS138-R6KT derivative containing up- and downstream regions flanking the $\Delta$ <i>hp1366</i> deletion                                                       | This study |
| pUC19         | Amp <sup>r</sup> , Colx101, MCS within <i>lacZ</i> : blue/white selection                                                                                                           | 13         |

Supplementary Table 4: Genome sequencing coverages for clones from Transformation Cycle (TC) experiments (454 FLX pyrosequencing).

| Sample ID | Project | DNA addition | Coverage |
|-----------|---------|--------------|----------|
| Control 1 | TC      | -            | 30       |
| Control 2 | TC      | -            | 33       |
| 1_1       | TC      | +            | 35       |
| 1_5       | TC      | +            | 35       |
| 1_9       | TC      | +            | 29       |
| 1_10      | TC      | +            | 31       |
| 2_1       | TC      | +            | 36       |
| 2_5       | TC      | +            | 39       |
| 2_8       | TC      | +            | 22       |
| 2_10      | TC      | +            | 36       |

Supplementary Table 5: Genome sequencing coverages for reference strains and clones from Transformation Cycle (TC) experiments (Illumina MiSeq).

| Sample ID               | Project   | Index 1 (I7) | Index 2 (I5) | % Reads Identified (PF) | No. Reads (paired) | Calculated Coverage |
|-------------------------|-----------|--------------|--------------|-------------------------|--------------------|---------------------|
| References              |           |              |              |                         |                    |                     |
| <i>H. pylori</i> -26695 | reference | CGAGGCTG     | CTCTCTAT     | 1.9222                  | 540,621            | 101                 |
| BAC-454                 | reference | GTAGAGGA     | AGAGTAGA     | 1.6389                  | 460,942            | 86                  |
| BAC-465                 | reference | TAAGGCGA     | GTAAGGAG     | 1.8728                  | 526,722            | 99                  |
| BAC-339                 | reference | CGTACTAG     | ACTGCATA     | 1.8083                  | 508,591            | 95                  |
| TC clones               |           |              |              |                         |                    |                     |
| 1-1-1                   | TC        | TAAGGCGA     | TAGATCGC     | 0.9053                  | 301,044            | 56                  |
| 1-1-2                   | TC        | TAAGGCGA     | CTCTCTAT     | 1.8733                  | 622,954            | 117                 |
| 1-1-3                   | TC        | TAAGGCGA     | TATCCTCT     | 0.9676                  | 321,778            | 60                  |
| 1-1-4                   | TC        | TAAGGCGA     | AGAGTAGA     | 1.1483                  | 381,864            | 72                  |
| 1-1-5                   | TC        | TAAGGCGA     | GTAAGGAG     | 1.0900                  | 362,466            | 68                  |
| 1-1-6                   | TC        | CGTACTAG     | ACTGCATA     | 1.7822                  | 592,656            | 111                 |
| 1-2-1                   | TC        | CGTACTAG     | AAGGAGTA     | 1.4415                  | 479,366            | 90                  |
| 1-2-2                   | TC        | AGGCAGAA     | AAGGAGTA     | 1.9520                  | 548,995            | 103                 |
| 1-2-3                   | TC        | CGTACTAG     | TAGATCGC     | 0.8129                  | 270,336            | 51                  |
| 1-2-4                   | TC        | CGTACTAG     | CTCTCTAT     | 0.8834                  | 293,764            | 55                  |
| 1-2-5                   | TC        | AGGCAGAA     | TATCCTCT     | 1.0718                  | 356,420            | 67                  |
| 1-2-6                   | TC        | AGGCAGAA     | AGAGTAGA     | 0.8715                  | 289,804            | 54                  |
| 2-1-1                   | TC        | AGGCAGAA     | GTAAGGAG     | 1.0266                  | 341,402            | 64                  |
| 2-1-2                   | TC        | AGGCAGAA     | ACTGCATA     | 0.8756                  | 291,164            | 55                  |
| 2-1-3                   | TC        | AGGCAGAA     | AAGGAGTA     | 0.9076                  | 301,834            | 57                  |
| 2-1-4                   | TC        | TCCTGAGC     | CTAAGCCT     | 0.9231                  | 306,988            | 58                  |
| 2-1-5                   | TC        | TCCTGAGC     | TAGATCGC     | 0.7762                  | 258,136            | 48                  |
| 2-1-6                   | TC        | TCCTGAGC     | CTCTCTAT     | 1.1398                  | 379,026            | 71                  |
| 2-2-1                   | TC        | TCCTGAGC     | TATCCTCT     | 1.4702                  | 488,910            | 92                  |
| 2-2-2                   | TC        | TCCTGAGC     | AGAGTAGA     | 1.2260                  | 407,712            | 76                  |
| 2-2-3                   | TC        | GGACTCCT     | GTAAGGAG     | 1.4386                  | 478,416            | 90                  |
| 2-2-4                   | TC        | GGACTCCT     | ACTGCATA     | 1.4043                  | 467,006            | 88                  |
| 2-2-5                   | TC        | GGACTCCT     | AAGGAGTA     | 1.2592                  | 418,752            | 79                  |
| 2-2-6                   | TC        | GGACTCCT     | CTAAGCCT     | 2.0373                  | 677,506            | 127                 |
| 3-1                     | TC        | GGACTCCT     | TAGATCGC     | 1.0747                  | 381,260            | 71                  |
| 3-2                     | TC        | TAGGCATG     | CTCTCTAT     | 1.3148                  | 437,236            | 82                  |
| 3-3                     | TC        | TAGGCATG     | TATCCTCT     | 1.1417                  | 379,680            | 71                  |
| 3-4                     | TC        | TAGGCATG     | AGAGTAGA     | 1.6861                  | 560,714            | 105                 |
| 3-5                     | TC        | TAGGCATG     | GTAAGGAG     | 1.7418                  | 579,240            | 109                 |
| 3-6                     | TC        | TAGGCATG     | ACTGCATA     | 1.4093                  | 468,672            | 88                  |

Supplementary Table 6: Genome sequencing coverages for clones from Short Term Transformation (STT) experiments (Illumina MiSeq).

| Sample ID | Project | Index 1 (I7) | Index 2 (I5) | % Reads Identified (PF) | No. Reads (paired) | Calculated Coverage |
|-----------|---------|--------------|--------------|-------------------------|--------------------|---------------------|
| 1-1-1-Cm  | STT     | TAAGGCGA     | TAGATCGC     | 0.6309                  | 379,240            | 71                  |
| 1-1-2-Cm  | STT     | CGTACTAG     | CTCTCTAT     | 18.9819                 | 11,410,908         | 2140                |
| 1-1-3-Cm  | STT     | AGGCAGAA     | CTCTCTAT     | 1.776                   | 1,067,612          | 200                 |
| 1-1-4-Cm  | STT     | TCCTGAGC     | AGAGTAGA     | 1.9418                  | 1,167,304          | 219                 |
| 1-1-5-Cm  | STT     | GGACTCCT     | GTAAGGAG     | 2.2741                  | 1,367,068          | 256                 |
| 1-1-10-Cm | STT     | GTAGAGGA     | CTCTCTAT     | 2.3046                  | 1,019,328          | 191                 |
| 1-1-11-Cm | STT     | GTAGAGGA     | TATCCTCT     | 1.931                   | 854,056            | 160                 |
| 1-1-12-Cm | STT     | GTAGAGGA     | AGAGTAGA     | 1.4854                  | 657,002            | 123                 |
| 1-1-13-Cm | STT     | AAGAGGCA     | GTAAGGAG     | 1.1962                  | 529,092            | 99                  |
| 1-1-14-Cm | STT     | AAGAGGCA     | CTCTCTAT     | 1.8391                  | 813,402            | 153                 |
| 1-1-15-Cm | STT     | CGAGGCTG     | TATCCTCT     | 2.2141                  | 979,282            | 184                 |
| 1-2-1-Cm  | STT     | CGAGGCTG     | AAGGAGTA     | 1.1986                  | 720,540            | 135                 |
| 1-2-2-Cm  | STT     | AAGAGGCA     | ACTGCATA     | 1.738                   | 1,044,796          | 196                 |
| 1-2-3-Cm  | STT     | GTAGAGGA     | GTAAGGAG     | 2.3832                  | 1,432,668          | 269                 |
| 1-2-4-Cm  | STT     | TAAGGCGA     | TAGATCGC     | 1.8022                  | 835,090            | 157                 |
| 1-2-10-Cm | STT     | CGAGGCTG     | AGAGTAGA     | 1.985                   | 877,968            | 165                 |
| 1-2-11-Cm | STT     | GCTACGCT     | GTAAGGAG     | 2.5521                  | 1,128,756          | 212                 |
| 1-2-12-Cm | STT     | GCTACGCT     | CTCTCTAT     | 2.7786                  | 1,228,970          | 230                 |
| 1-2-13-Cm | STT     | CAGAGAGG     | TATCCTCT     | 2.0648                  | 913,264            | 171                 |
| 1-2-14-Cm | STT     | CAGAGAGG     | AGAGTAGA     | 2.2108                  | 977,804            | 183                 |
| 1-2-15-Cm | STT     | CTCTCTAC     | GTAAGGAG     | 1.5898                  | 703,160            | 132                 |

## Reference List

1. Alm, R. A., *et al.* "Comparative genomics of *Helicobacter pylori*: analysis of the outer membrane protein families," *Infect Immun* **68**, 4155 (2000)
2. Hanahan, D. "Studies on Transformation of *Escherichia coli* With Plasmids," *J Mol Biol* **166**, 557 (1983)
3. Miller, V. L. and Mekalanos, J. J. "A novel suicide vector and its use in construction of insertion mutations: osmoregulation of outer membrane proteins and virulence determinants in *Vibrio cholerae* requires *toxR*," *J Bacteriol* **170**, 2575 (1988)
4. Casadaban, M. J. and Cohen, S. N. "Analysis of Gene Control Signals by DNA Fusion and Cloning in *Escherichia coli*," *J Mol Biol* **138**, 179 (1980)
5. Tomb, J. F., *et al.* "The complete genome sequence of the gastric pathogen *Helicobacter pylori*," *Nature* **388**, 539 (1997)
6. Krebs, J., *et al.* "The complex methylome of the human gastric pathogen *Helicobacter pylori*," *Nucleic Acids Res* **42**, 2415 (2014)
7. Kulick, S., *et al.* "Mosaic DNA imports with interspersions of recipient sequence after natural transformation of *Helicobacter pylori*," **3**, e3797 (2008)
8. Ge, Z., Hiratsuka, K., and Taylor, D. E. "Nucleotide Sequence and Mutational Analysis Indicate That Two *Helicobacter pylori* Genes Encode a P-Type ATPase and a Cation-Binding Protein Associated With Copper Transport," *Mol Microbiol* **15**, 97 (1995)
9. Behrens, W., *et al.* "Role of Energy Sensor TlpD of *Helicobacter pylori* in Gerbil Colonization and Genome Analyses After Adaptation in the Gerbil," *Infect Immun* **81**, 3534 (2013)
10. Labigne-Roussel, A., Courcoux, P., and Tompkins, L. "Gene Disruption and Replacement as a Feasible Approach for Mutagenesis of *Campylobacter jejuni*," *J Bacteriol* **170**, 1704 (1988)
11. Lassak, J., Henche, A. L., Binnenkade, L., and Thormann, K. M. "ArcS, the cognate sensor kinase in an atypical Arc system of *Shewanella oneidensis* MR-1," *Appl Environ Microbiol* **76**, 3263 (2010)
12. Suerbaum, S., Josenhans, C., and Labigne, A. "Cloning and genetic characterization of the *Helicobacter pylori* and *Helicobacter mustelae* *flaB* flagellin

- genes and construction of *H. pylori* *flaA*- and *flaB*-negative mutants by electroporation-mediated allelic exchange," *J Bacteriol* **175**, 3278 (1993)
13. Yanisch-Perron, C., Vieira, J., and Messing, J. "Improved M13 Phage Cloning Vectors and Host Strains: Nucleotide Sequences of the M13mp18 and pUC19 Vectors," *Gene* **33**, 103 (1985)
